# Supplementary material
Source: PubMed Central journal article supplement (PMC3277184)
Supplement: 1119864109_pnas.201119864SI.pdf [file 1119864109_pnas.201119864SI.pdf]

# Supporting Information

Meng et al. 10.1073/pnas.1119864109

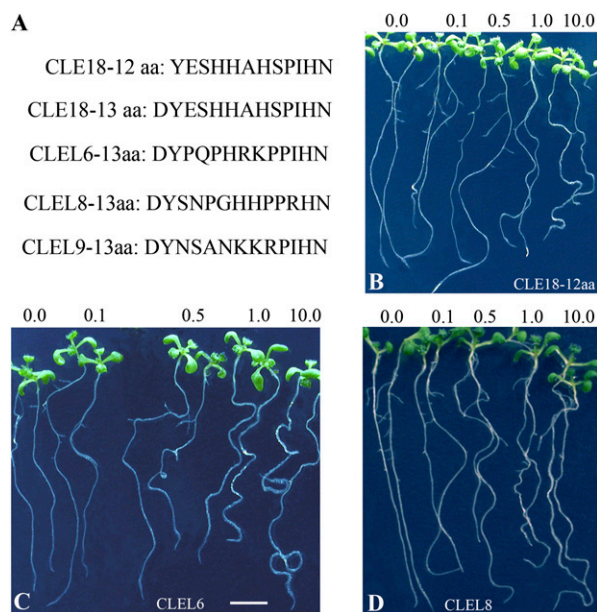

**Fig. S1.** The synthetic 12- or 13-amino acid (aa) peptides derived from a CLE-like (CLEL) motif triggered a wavy-root phenotype. (A) Sequences of the synthetic CLEL peptides used in this study. (B–D) Nine-day-old wild-type seedlings grown vertically in the light on MS medium containing the indicated concentration (0, 0.1, 0.5, 1.0, 10.0  $\mu$ M) of the synthetic CLEL peptide specified: 12-aa CLE18 (B), 13-aa CLEL6 (C), and 13-aa CLEL8 (D). (Scale bar, 5 mm.)

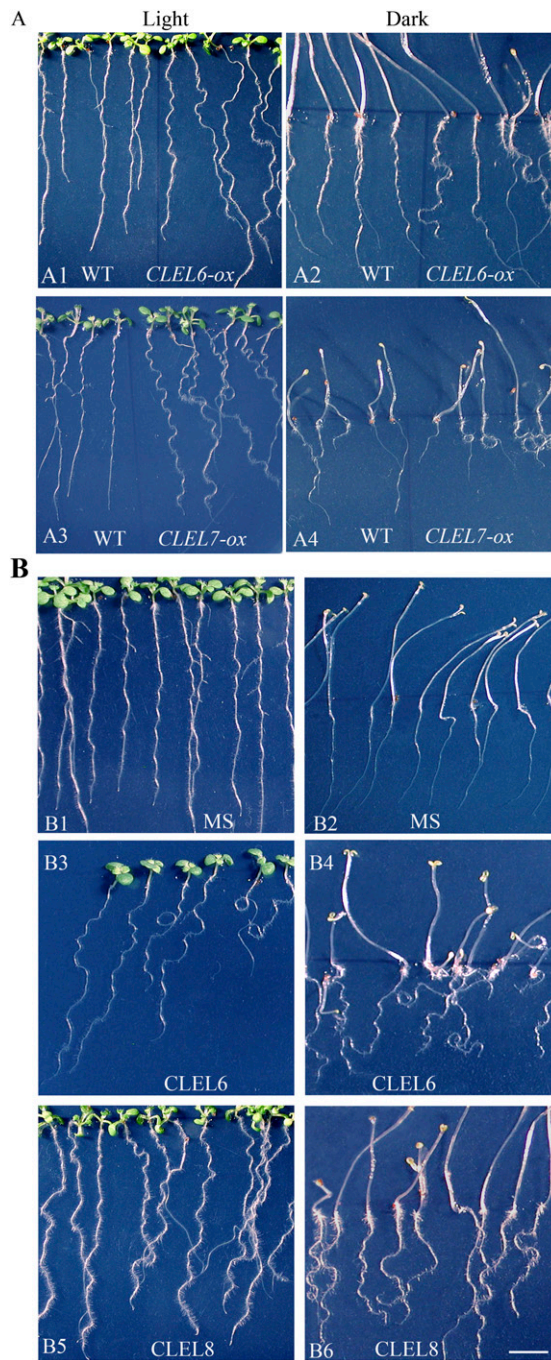

**Fig. S2.** Overexpression of *CLE*-like (*CLEL*) genes (A) or exogenous application of *CLEL* peptides (B) caused wavy roots under both light and dark conditions. Nine-day-old *Arabidopsis* seedlings were grown on 1.5% agar plates inclined at 45° in the light (Left columns) and dark (Right columns). Shown are plants overexpressing *CLEL6* (*CLEL6-ox*) (A1 and A2) or overexpressing *CLEL7* (*CLEL7-ox*) (A3 and A4). Also shown are plants grown in the light (A1 and A3) or in the dark (A2 and A4). Wild-type plants grown on MS medium (B1 and B2) or on medium containing 1.0  $\mu$ M synthetic 13-amino-acid *CLEL6* (B3 and B4) or *CLEL8* (B5 and B6) peptide. Seedlings were grown in the light (B1, B3, and B5) or in the dark (B2, B4, and B6). (Scale bar, 5 mm.)

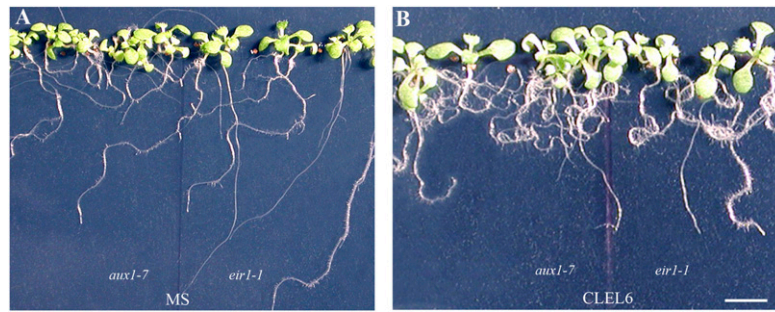

**Fig. S3.** CLE-like (CLEL) peptide-mediated wavy-root phenotype is independent of gravitropic response in *Arabidopsis*. Nine-day-old *Arabidopsis aux1-7* (on left in A and B) or *eir1-1* (on right in A and B) mutant plants were grown on MS medium (A) or on medium containing 1.0  $\mu\text{M}$  CLEL6 peptide (B). (Scale bar, 5 mm.)

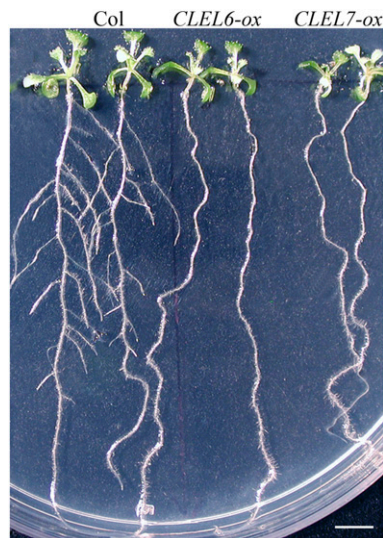

**Fig. S4.** Delayed lateral root development caused by *CLE-like (CLEL)* overexpression in 12-d-old *Arabidopsis* plants. The wild-type seedlings are shown on the left (Col), whereas the seedlings overexpressing *CLEL6 (CLEL6-ox)* and *CLEL7 (CLEL7-ox)* are shown in the center and on the right, respectively. (Scale bar, 5 mm.)

**Table S1. CLEL genes in *Arabidopsis***

| <i>CLELs (RGFs*)</i> | Locus no. | Size of full protein | Position of CLEL motif | CLEL motif      |
|----------------------|-----------|----------------------|------------------------|-----------------|
| <i>CLE18</i>         | AT1G66145 | 101                  | 75–87                  | DYESHHAHSPIHN   |
| <i>CLEL1 (RGF2)</i>  | AT1G13620 | 109                  | 97–109                 | DYWKPRHHPPKNN   |
| <i>CLEL2 (RGF8)</i>  | AT2G03830 | 123                  | 104–116                | DYRTFRRRRPVHN   |
| <i>CLEL3 (RGF3)</i>  | AT2G04025 | 111                  | 97–110                 | DYWRAKHHPPKNN   |
| <i>CLEL4 (RGF7)</i>  | AT3G02240 | 102                  | 90–102                 | DYGQRKYKPPVHN   |
| <i>CLEL5</i>         | AT3G02242 | 111                  | 97–111                 | DYQGPKPRSKPLKNN |
| <i>CLEL6 (RGF6)</i>  | AT4G16515 | 86                   | 71–83                  | DYPQPHRKPPHN    |
| <i>CLEL7 (RGF5)</i>  | AT5G51451 | 88                   | 76–88                  | DYPKPSTRPPRHN   |
| <i>CLEL8 (RGF1)</i>  | AT5G60810 | 116                  | 104–116                | DYSNPGHHPPRHN   |
| <i>CLEL9 (RGF9)</i>  | AT5G64770 | 79                   | 66–78                  | DYNSANKKRPIHN   |

CLEL, CLE-like; RGF, root growth factor.

\*There is no RGF4 peptide (DYRGPARRHPPRHN) in locus AT3g30350 in the TAIR10 Proteins Dataset.

**Table S2. Expression levels of *CLEL* genes in roots and other representative tissues**

| <i>CLELs</i> ( <i>RGFs</i> ) | Expression levels in roots | Expression levels in other representative tissues                                                                                                                                           |
|------------------------------|----------------------------|---------------------------------------------------------------------------------------------------------------------------------------------------------------------------------------------|
| <i>CLEL2</i> ( <i>RGF8</i> ) | 22.15                      | 70.71 (stamens, flower stage 12)                                                                                                                                                            |
| <i>CLEL3</i> ( <i>RGF3</i> ) | 96.75                      | 45.29 (siliques stage 5 with seeds)                                                                                                                                                         |
| <i>CLEL4</i> ( <i>RGF7</i> ) | 26.26                      | 9.81 (sepals, flower stage 15)                                                                                                                                                              |
| <i>CLEL6</i> ( <i>RGF6</i> ) | 17.55                      | 5.18 (hypocotyl)<br>74.14 (vegetative rosette);<br>74.18 (shoot apex);<br>904.2 (petals, flower stage 15);<br>1,089.66 (stamens, flower stage 15);<br>140.13 (siliques with seeds, stage 3) |
| <i>CLEL9</i> ( <i>RGF9</i> ) | 0.36                       | 246.83 (cotyledon);<br>172.68 (cauline leaf);<br>74.7 (vegetative rosette);<br>26.88 (shoot apex);<br>101.63 (siliques with seeds, stage 4)                                                 |

Data source: *Arabidopsis* eFP Browser ([http://bar.utoronto.ca/efp\\_arabidopsis/cgi-bin/efpWeb.cgi](http://bar.utoronto.ca/efp_arabidopsis/cgi-bin/efpWeb.cgi)). *CLEL*, *CLE*-like; *RGF*, root growth factor.

**Table S3. Primer sequences used for generating the *CLE*-like (*CLEL*) gene constructs**

| Primer name            | Sequence 5'–3'                   |
|------------------------|----------------------------------|
| <i>CLE18</i> Xho 5F    | CGCTCGAGATGCATTTGTTAAAAGGTGG     |
| <i>CLE18</i> Bam 3R    | CGGGATCCCTAGACTCCAATCAAATGAC     |
| <i>CLEL6</i> Xho5F     | CGCTCGAGATGTCTTGCTCTTTGAGGAG     |
| <i>CLEL6</i> Bam 3R-NL | CGGGATCCCAGACTTCTCGTTGTGGATCG    |
| <i>CLEL6</i> Bam 3R-CL | CGGGATCCTTAAGACTTCTCGTTGTGGATC   |
| <i>CLEL7</i> Xho5F     | CGCTCGAGATGAGCTCAATCCATGTTGC     |
| <i>CLEL7</i> Bam 3R-NL | CGGGATCCCGTTATGGCGTGGAGGCCGA     |
| <i>CLEL7</i> Bam 3R-CL | CGGGATCCTCAGTTATGGCGTGGAGGCCGA   |
| <i>CLEL9</i> Xho5F     | CGCTCGAGATGGCA ATTAGGGTTCCCA     |
| <i>CLEL9</i> Bam 3R-NL | CGGGATCCCAGCGAT GTGTATCGGTCTTTTC |
| <i>CLEL9</i> Bam 3R-CL | CGGGATCCTTAGCGATTGTGTATCGGTCT    |
